# Supplementary material for: Lightwave-controlled band engineering in quantum materials
Source: Research Square preprint supplement (doi:10.21203/rs.3.rs-2762919/v1), 2023-04-04
Supplement: Supplementary file 2 [file 7d6850f341c5df3b69e11266.docx]

Methods for

Lightwave-controlled band engineering in quantum materials

Sambit Mitra et al.

## Theoretical model

The model was described in detail in Ref.1. Here, we provide further details of its derivation and application to our case.

### Definition of the lattice

Hexagonal boron nitride is formed by two triangular sub-lattices and , hosting the boron and nitrogen atoms, respectively. In Extended Data Fig. 1a we show the lattice up to next-nearest neighbour atoms. The two lattice vectors can be defined as

|  |  | (1) |
| --- | --- | --- |

where is the distance between nearest neighbours. The distance from atom to atom can be written in terms of and the angle between those two atoms (see Extended Data Fig. 1a),

|  |  | (2) |
| --- | --- | --- |

where for nearest neighbours and next-nearest neighbours, respectively. The Brillouin zone of hBN is shown in Extended Data Fig. 1b, along with its high-symmetry points.

### Definition of the field

We start with a bicircular field vector, which results from the combination of two counter-rotating circular fields of and frequency. We define it as,

|  |  | (3) |
| --- | --- | --- |

The field strengths of the fundamental and second harmonic fields are and , respectively, and is the phase delay between the two fields. From the electric field, we define the vector potential, , so that

|  |  | (4) |
| --- | --- | --- |

With this definition, both the electric field and the vector potential rotate clockwise. When we switch the helicities of the two circular fields such that , we obtain

|  |  | (5) |
| --- | --- | --- |

and

|  |  | (6) |
| --- | --- | --- |

In this case, both the electric field and vector potential rotate counter-clockwise. Between and , the field has rotated in space by 180 (compare green curves in panels a and d of Extended Data Fig. 2). However, the orientation of the vector potential is the same for and (compare purple curves in panels b and e of Extended Data Fig.2).

For generality, let us also consider the bicircular field defined as

|  |  | (7) |
| --- | --- | --- |

and, consequently,

|  |  | (8) |
| --- | --- | --- |

When we perform the following switch of the circular field helicities ,

|  |  | (9) |
| --- | --- | --- |

and

|  |  | (10) |
| --- | --- | --- |

In this case, and maintain the same spatial orientation, but the spatial orientation of the vector potential is rotated by 180 with respect to that of .

Below we will show that, regardless of the definition of the bicircular field that we use, it is the orientation of the vector potential relative to the crystal lattice (or Brillouin zone) which determines the band structure modification.

### Laser-induced complex next-nearest neighbour hopping

To understand the physical mechanism governing the band modification and the consequent valley polarization, we will use a two-orbital tight binding model of gapped-graphene, which captures the essential physics of the problem. The gapped graphene lattice is the same as that of hBN, with one orbital per site. Those in sub-lattice have on-site energy while those in sub-lattice have on-site energy . We will assume that, in the field-free state, next-nearest neighbour hoppings are negligible. However, upon interaction with the bicircular field, can be induced through *virtual* nearest-neighbour hoppings . We will calculate this correction to lowest order in the field-matter interaction. To do so, we note that a laser field modifies the nearest neighbour hopping between an orbital in sub-lattice and an orbital in sub-lattice according to the Peierls substitution,

|  |  | (11) |
| --- | --- | --- |

where is the field-free nearest-neighbour hopping, is the distance from the site in sub-lattice to the site in sub-lattice , and is the vector potential of the field. The laser-induced hopping term can be separated into one cycle-averaged term and one term that contains the dynamical corrections to this cycle average,

|  |  | (12) |
| --- | --- | --- |

where mean cycle-averaged. Therefore, we have

|  |  | (13) |
| --- | --- | --- |

This perturbation can lead to transitions between next nearest neighbours () of the same sub-lattice through virtual nearest neighbours. To lowest order, the transition amplitude for such second-order process reads (atomic units are used throughout)

|  |  | (14) |
| --- | --- | --- |

where the energy difference , where is the minimum band gap energy (we take ). The summation in principle runs along all possible intermediate states in sub-lattice B. However, we note that there is only one nearest-neighbour site that can participate. For example, looking at Extended Data Fig.1, we see that the transition from site A-11 to site A00 can only happen to first order through B01. Therefore, we can drop the summation. Using Eq. 13,

|  |  | (15) |
| --- | --- | --- |

We perform a change of variables in the second integral, , . For moderately strong fields and large gap materials, we have that , so that we can neglect the second term in and write . In this way, the second integral is easily computed as

|  |  | (16) |
| --- | --- | --- |

Substituting Eq. 16 into Eq. 15,

|  |  | (17) |
| --- | --- | --- |

The above expression is the lowest order transition amplitude expression between two sites in sub-lattice . From it, we can identify the transition matrix element between the next-nearest neighbour sites and , () by realizing that the transition amplitude is defined as

|  |  | (18) |
| --- | --- | --- |

Hence,

|  |  | (19) |
| --- | --- | --- |

Averaging now over one cycle,

|  |  | (20) |
| --- | --- | --- |

If the transition is between two next-nearest neighbours of the other sub-lattice (), then we need to substitute , and

|  |  | (21) |
| --- | --- | --- |

In Extended Data Fig. 2 we give some representative examples of and for different vector potentials. We note the following. First, the cycle-averaged, laser-induced next-nearest neighbour hoppings are complex whenever the vector potential is not pointing towards the direction. The imaginary component is maximum when the vector potential points along or , and it switches sign between these two orientations. Second, the hopping only depends on the orientation of the vector potential, not its sense of rotation (compare Extended Data Fig. 2b and Extended Data Fig. 2d). The band structure is modified by rotating the vector potential, which can be achieved on a sub-cycle timescale by changing the two-color phase delay . Finally, we also note that even when the vector potential is pointing towards the point, the band gap is reduced relative to the field-free case due to a modification of both the nearest neighbour and next-nearest neighbour hoppings. In this case, however, since the next-nearest neighbour hopping is real, the gap is reduced equally in both valleys.

### Numerical calculations

We perform time-dependent simulations on a tight model of gapped graphene using the code described in Ref.2. The field-free tight binding parameters are  a.u., , where  eV and  eV,  a.u., taken similar to those of graphene. Next-nearest neighbour hoppings and higher are neglected. We perform simulations for all the definitions of the bicircular fields given by Eqs. 3 - 10. The field parameters are  a.u., which correspond to an intensity in the crystal of  TW/cm and  TW/cm, the fundamental frequency is  eV and we use a Gaussian envelope with 30 fs of full width at half maximum for both fields. The time-dependent propagation is converged on a Monkhorst-Pack k-grid of 300 x 300 points and a time step of 0.1 a.u. The dephasing time is set to 6 fs, but different values do not change our results.

Figures 2c, f, i show the electron populations resolved in the first Brillouin zone after the interaction with the bicircular field, for three representative orientations and helicities of the latter. We note that the polarized valley corresponds to that in which the model predicts the band gap is reduced, and thus depends on the relative orientation of the vector potential relative to the lattice (see Extended Data Fig. 2b, e, h). In order to compare with the experimental observable, after the bicircular field we add a linearly-polarized probe field with the fundamental frequency and record the left and right helicities of its third harmonic, which are obtained from the complex orthogonal unit basis vectors3

|  |  | (22) |
| --- | --- | --- |

The field strength of the probe field is  a.u and its duration is 30 fs of full width at half maximum. The results are shown in Extended Data Fig. 3 and Extended Data Fig. 4 for the different definitions of the bicircular field given by Eqs. 3 - 10. We performed simulations with the probe polarized along and along and obtained the same results (Extended Data Fig. 5).

A few points are worth noting. First, in every case the helicity of the third harmonic follows and distinguishes the valley polarization. We take Extended Data Fig. 3a as an example. We see that for , the left helicity is dominant, and is linked to valley polarization at K’ (panel c). For , equal contributions of right and left helicities in panel a are a consequence of equal valley polarizations (panel d). For , a valley polarization at K (panel e) gives rise to a dominant right helicity.

Second, there is one helicity with a clearly dominant oscillation amplitude: in Extended Data Fig. 3, it is the left helicity in panel a and the right helicity in panel b. This reflects the fact that the valley population oscillates stronger in one of the valleys (K’ valley for panels c-e and K valley for panels f-h) due to the residual effect of the multi-photon valley-dependent selection rules, as mentioned in the main text.

In Extended Data Fig. 3a, we used the bicircular field (and vector potential) given by Eq. 3 (Eq. 4). Upon a change of helicity of the bicircular field according to Eq. 6, the result is Extended Data Fig. 3b. One can see that the strongly-oscillating helicity curves in panels a and b of Extended Data Fig. 3 beat out-of-phase. This is because the change of the bicircular driver helicity does not change the vector potential orientation, so that the same valley is polarized for the same (compare panels c and f in Extended Data Fig. 3). However, the helicity switch does change the multi-photon valley-dependent selection rule, so that the helicity that undergoes the stronger oscillation switches from panel a to b. All of this results in an out-of-phase beating between the two helicity signals. In contrast, Extended Data Fig. 4 uses the definition of the bicircular field in Eq. 7 for panel a (clockwise rotation), and that of Eq. 9 for panel b (counter-clockwise rotation). Here, the vector potential changes its orientation by 180 when the helicity of the bicircular field is changed as shown in panel a and panel b. As a consequence, the valley polarization changes for the same value of (compare panels c and f), so that the two strongly-oscillatory helicities are in phase.

As can be seen in Fig. 4 of the main text, the scenario in the experiment is that given by Extended Data Fig. 3, with the two strongly-oscillatory helicity signals out-of-phase. We note, however, that the sub-cycle control of the band structure is universal. For all cases, one modifies the band gap magnitude and position (and, consequently, the valley polarization) by rotating the vector potential, which is achieved by changing the two-color phase delay .

# Experimental details

## Laser system

The laser pulses used for the experiments originate from a mid-IR laser system based on Optical Parametric Chirped Pulsed Amplification (OPCPA). Details are described in Ref.4. In brief, the laser for the mid-IR OPCPA is based on a 1 µm Innoslab Yb laser system. The pulses are used to generate the seed and the pump for the OPCPA. The OPCPA system produces pulses at 2.03 µm center wavelength at 100 kHz repetition rate. During the experiment, the average power obtained from the laser was between 5.5 - 6 W, with a pulse duration of ≈ 25 fs. The pulse duration was carefully characterized using the frequency-resolved optical gating (FROG) technique5, with a setup developed in-house. The characterization of the laser pulses is performed after they pass through the interferometer. They are picked up right before entering the reflective objective of the microscope arrangement to accurately determine the temporal characteristics of the pulses used in the experiment. An SHG FROG was performed to characterize the 1 µm pulses in a Beta-Barium Borate (BBO) crystal, while the 2 µm pulses were characterized by surface third harmonic generation (THG) FROG on glass (NBK7), both in a non-collinear geometry. The results of these measurements are shown below.

## Interferometer

A large part of this experiment constitutes a three-arm Mach–Zehnder interferometer, as shown in Extended Data Fig. 6. In the following subsections, various aspects of the interferometer are described in detail.

### Pump

The 2 µm wavelength pulses from the laser source are directly fed into an interferometer which consists of three arms. First, the pulses are split in two by a 50-50 beam splitter (BS) (red beam from right to left in Extended Data Fig. 6), where the reflected part proceeds to the pump- and the transmitted one to the probe arm. The pump beam is sent through a 1.5 mm thick Lithium Niobate (LiNbO3) crystal (SHG) cut at 45.6°. This interaction produces a second pulse at half the wavelength (frequency: 2ω) of the fundamental (frequency: ω) by sum frequency generation (SHG)6. LiNbO3 is well suited for a 2 µm fundamental wavelength, given its wide transparency range in the mid-infrared, up to 3.5 µm. The phase matching conditions (Type 1) lead to the second harmonic component being cross polarized with respect to the fundamental pulse6. The co-propagating two-color pulses (ω and 2ω) are separated using a custom-designed dichroic beam splitter (DBS). The ω arm passes through a variable neutral density filter, a retro-reflection stage, and CaF2 as used in the probe arm, but without the piezo motion rails as this arm's length is kept fixed with respect to the other arms. Additionally, a wire grid polarizer (Pol.) is placed in its path to clean its polarization state before it combines with the 2ω arm at another dichroic beam splitter (DBS). The 2ω arm is reflected off the first dichroic beam splitter at 90° and it traverses the exact same arrangement as the ω arm. The only difference is a different pair of custom chirped mirrors for 2ω on the delay stage above a closed-loop stick-slip piezo nano-positioning rail with a positioning resolution of 1 nm, different amount of dispersion compensating material and a perpendicular axis set on the polarizer. The pump arm (co-propagating ω and 2ω) is further sent through a long-pass spectral filter (F1) to block the parametric optical signals generated at the harmonics of the two-color pump in the LiNbO3 crystal. Finally, the two-color pump (ω -2ω) pulses pass through the fused silica wedged pair to recombine with the probe pulses (ω) which are reflected off it. After the three-arm interferometer, the laser beam is expanded using a reflective telescope arrangement to roughly match the input diameter of the tight-focusing reflective objective and adjust the beam divergence. However, right before the focusing objective, a broadband quarter-wave plate (λ/4) is placed with the optical axis at 45° with respect to the cross-polarized axis of the two-color pump. This wave plate arrangement transforms the linear cross-polarized pump pulses into circularly polarized counter-rotating pulses that look like a trefoil or a three-leaf pulse in the XY plane, as required in the experiment. The quarter waveplate is intentionally placed right before the focusing element to prevent any changes in ellipticity due to a phase shift between the ‘s’ and ‘p’ polarization components upon reflection, especially from beam folding mirrors and other coated optical elements. For the ω and 2ω pump components the measured pulse durations just before the focusing objective are about 26 fs and 48 fs, respectively. Extended Data Fig. 7 depicts the spectral and temporal characteristics of the ω and 2ω pump components. A similar kind of waveform synthesizer was also used earlier in attosecond controlled strong field experiments by the group7.

### Probe

In the probe arm, the pulses go through a variable neutral density filter followed by a delay stage, which, along with a pair of silver retro-reflecting mirrors, hosts two customized chirped mirrors for positive dispersion and spectral filtering at the same time. Spectral filtering is crucial given the existence of weak optical signals at lower wavelengths arising from the parametric processes in various crystals in the laser system. The delay stage is mounted on a closed-loop stick-slip piezo rail (Smaract SLC-24 series) with a positioning resolution of 1 nm. Further down, the pulses go through a defined thickness of material (CaF2) to compensate for excess positive dispersion. Additionally, another long-pass spectral filter is placed in the beam path to further suppress the unwanted optical signals at lower wavelengths. Finally, the probe pulses go through a half (λ/2)- and quarter (λ/4)- waveplate, after which these are reflected off the wedge plate and recombine with the pump beam. The use of this waveplate combination allows for controlling the polarization state of the probe pulses and the mechanism is described in greater detail later. This wedge pair arrangement not only acts as a beam recombination element but also as a power attenuator for the probe pulses as only 4% of the power is reflected. After recombining, it follows the colinear path with the pump beam. Just before the focusing objective a pulse duration of about 26 fs is achieved for the probe pulses.

As shown in Extended Data Fig. 6, a λ/4 plate is the last optical element before the pulses enter the reflective objective. This leads to a major problem where the third arm or the linearly polarized probe as in this experiment cannot remain linear once passing through the λ/4 plate unless it is along the optical axis at 45°. Also, a linear polarization launched at 45° with respect to ‘s’ or ‘p’ polarization states loses its linear contrast as it becomes elliptic on acquiring a different phase-shift in the ‘s’ and ‘p’ components on every reflective optic in its beam path. To have full flexibility over the polarization state of the probe pulses after the λ/4 plate, a novel scheme was implemented where a combination of a λ/2 and λ/4 wave plates were placed additionally in the probe arm as also depicted in Extended Data Fig. 6. Intuitively, one can think of these additional plates as inducing perfectly opposing elliptical polarization which cancels out in the final λ/4 before the reflective objective to produce linearly polarized light with a high extinction ratio. This scheme was also numerically tested using a Jones matrix approach. It was observed that any arbitrary shifts in phase between the `s' and `p' components in the beam path in-between the two λ/4 waveplates can be compensated. However, changes in magnitude between the ‘s’ and ‘p’ components lead to a deviation from linearity and cannot be compensated by this scheme.

A movable silver mirror at 45° is placed right before the reflective objective intercepting the probe pulses to optimize and characterize the polarization extinction ratio or linearity. They are then guided to an InGAs photodiode with a polarizer attached to it at a fixed angle. The fixed angle is kept such that the probe polarization is aligned along ‘s’ or ‘p’ to prevent any additional ellipticity induced by the intercepting mirror, which would not be present otherwise during the experiment.

### Trefoil pump rotation

When the bi-circular ω and 2ω components of the pump are combined in the interferometer such that the E-field ratio at the focus is 2:1, the coherent sum of their electric field in the XY plane (plane perpendicular to propagation) is transformed to that of a trefoil waveform. The rotation of the trefoil waveform is controlled by the sub-cycle phase delay between ω and 2ω component. Experimentally this is achieved by introducing optical path difference between ω and 2ω arms. When the central wavelength (λ0) of the ω arm is 2 µm, a rotation of 360° is induced by delaying the piezo stage by 3 µm. This information is used to convert the stage delay to angular rotation recorded with the experimental data. Additionally, the helicity of the trefoil is also a parameter that can be controlled in the experiment. This is achieved by rotating a λ/4 waveplate by 90°. In the current experiment, this corresponds to the λ/4 plate shown right before the reflective objective in Extended Data Fig. 6.

### Interferometric stability

During the experiment, it is critical that the angle of the three-leaf or trefoil pump remains stable which is directly linked to the delay between the two colors in the pump arm. To characterize the delay stability, an additional temperature-stabilized continuous wave (CW) diode laser (Thorlabs L785P090 with LDMT9) was sent through the two pump arms to interferometrically measure its path difference over time.

Using the above-mentioned scheme, the interferometric stability was found to be highest around two hours after switching on the driving laser system. Additionally, tests were carried out to measure the stability when the laser was going through the interferometer and the piezo delay-stage being scanned, as is during the experiment, as illustrated in Extended Data Fig. 8. Over a period of ten minutes, the standard deviation of the position generated by the closed-loop piezo stages from the position extracted from the CW interferometer is found to be close to 38.1 nm, which roughly translates to about 4.6° in rotation error of the ω − 2ω bi-circular trefoil structure.

## Microscope

The core segment of the microscope (see Extended Data Fig. 9) involves tight focusing of laser pulses from all three interferometer arms, followed by a collection and collimation configuration before the light proceeds to the detection apparatus. In between, a 500 µm thick fused silica substrate is placed hosting the hBN monolayer on the front surface.

The focusing was achieved without adding any dispersion or chromatic aberration, by using a reflective objective with a numerical aperture (NA) of 0.4. The beam profile in the interaction region is characterized by placing a CMOS sensor in the focal plane and the cross-section of the resulting 2D signal on the sensor is shown in Extended Data Fig. 10, for all three interferometer arms. The beam waist extracted from the fit are about 8.0 µm, 10.0 µm, and 9.7 µm for the 2ω pump, ω pump, and ω probe arms, respectively. The beam is largely circular at focus and the residual ellipticity is found to be below 5% for all the arms. The small focus spot sizes not only allow spatially restricting the laser interaction to a single hBN mono-crystalline grain, but also a Rayleigh length (201 µm for 2ω and 157 µm for ω) which is significantly smaller than the thickness of the fused silica substrate (see Extended Data Fig. 9). This allows individually optimizing the substrate position (back or front/hBN coated surfaces) in the focus, by observing surface-enhanced perturbative harmonics.

After the fused silica substrate is in the focus, the diverging beam along with other nonlinear signals is re-collimated using a long-working-distance transmissive objective with an NA of 0.45. A closely matched NA allows the complete divergent beams to be collected.

Further down, the laser pulses are polarization resolved using a quartz Wollaston prism. The prism introduces an angular separation of 10° between the ‘p’ and ‘s’ polarization components, which are then loosely focused by a CaF2 lens onto the two separate large area photodiodes. A λ/4 waveplate is placed between the transmission objective and Wollaston prism with its optical axis at 45° with respect to the prism to convert the photodiodes into helicity detectors.

## Spatio-temporal overlap

As described earlier, the implementation of a three-arm interferometer leads to the laser pulses traveling through three different non-collinear optical paths. Upon recombination, they require careful alignment such that they are spatially and temporally overlapped in the interaction region. To ensure this, the second-order and third-order non-linearity in fused silica is utilized where a two- and three-photon transition of ω and 2ω leads to the production of 3ω and 4ω photons, respectively. To utilize this effect, the 2ω pump is chosen as a common reference and the other pulses are aligned onto this particular arm. An initial spatial alignment of all three arms using irises is enough to ensure a coarse spatial overlap between the pulses at the focus on the fused silica substrate. Soon after, the 2ω pump arm is delayed with respect to the  pump arm while observing the 4 light with an appropriate band-pass filter before the photodiodes. The pump arms being counter-rotating bi-circular in their polarization state with respect to each other leads to the 3ω channel being disallowed. After the 2ω pump delay is fixed, its delay with respect to the probe arm is determined by scanning the probe delay stage and observing the 3ω or 4ω channels as both these transitions are allowed. After the temporal alignment, the spatial overlap is checked and optimized based on the respective parametric signals.

## Lock-in polarization detection

In this experiment, the signal of interest is the 3ω harmonic generated by probe and modulated by pump. However, there are multiple sources of light co-propagating along with the signal and impinging on the diodes. Hence, a simple amplified detection of the diode current is not enough to distinguish the relevant 3ω (λ ≈ 667 nm) signal. Signals which are spectrally different are already filtered using high- or low-pass spectral filters which block the fundamental 2ω, components above λ = 750 nm and other components below λ = 600 nm. However, the ω component is more of a problem, as no commercial filter could be found allowing a high transmission in the 3ω region while fully suppressing ω. Additionally, 3ω is also produced by the pump (2ω) and probe (ω) by a three-photon process on the silica substrate, thereby further polluting the experimental signal.

This major problem is overcome by a novel technique in which, the 2ω arm of the interferometer is modulated using a mechanical chopper wheel with a 50% duty-cycle at a known frequency. This forces the pump to oscillate between a purely circular ω or a bi-circular ω − 2ω configuration. Hence, the 3ω signal of interest, which is probed by a modulated bi-circular pump is also modulated at the chopping frequency, while the 3ω remaining in the background due to the ω arms are not. This modulated signal along with the background impinging on the photodiodes is amplified by two high-gain low-noise trans-impedance amplifiers attached right behind the respective photodiodes, to minimize noise picked up by cables. The amplified voltage signals are then fed into two time-synchronized lock-in amplifiers (Zurich Instruments).

In Extended Data Table 1, a list of detected signals, along with their origin, is given. It also depicts the method by which the background signals are rejected keeping the relevant signal detectable.

## hBN monolayer sample

The hBN monolayer samples used in this experiment are obtained from a commercial supplier (ACS Materials). These are grown using chemical vapor deposition (CVD) and subsequently transferred on the 500 µm thick large area (5 cm diameter) fused silica substrate. Although the monolayer patches, of characteristics size of about 10 µm typical for CVD grown samples, are covered on the large area, their orientations are random. These individual hBN patches were in-situ characterized by microscopy.

## SHG-polarization resolved microscopy

To characterize quality of the hBN patches, individually, we used in-situ polarization resolved second harmonic generation (SHG) microscopy. This was repeated before every experiment run.

SHG-polarization resolved microscopy was done with the 1 µm wavelength arm of the setup. Perturbative second harmonic is detected by a photodiode or spectrometer after being collected by the transmission objective and passed through bandpass filters and eventually a polarizer. The SHG is not only the strongest component but being an even harmonic, is a pure indicator of broken inversion symmetry in a crystal. Hence, the emission is also fully absent from the fused silica surface, leaving only odd layers of hBN (1L, 3L, 5L,...(2n+1)L), which break inversion symmetry to produce SHG. As ‘n’ increases, the magnitude of SHG drops8,9. Hence, a spatial scan over the substrate with the SHG strength as an optimization parameter leads to locating thinner odd layers of hBN.

Another important advantage of this technique lies in the fact that it can be performed in-situ during the final band engineering experiment to make sure that all three probe and bi-circular pump pulses also excite the same hBN grain as independently observed by this characterization technique.

Further, this technique not only allows the determination of inversion-symmetry breaking but also the orientation of the hBN crystals by observing the polarization response of the material. The two unique light-induced oscillation directions (armchair and zigzag) make the outgoing SHG polarization rotate in the opposite direction and at twice the rate, as a function of the rotation of the incoming/pump light polarization. This has been also widely investigated and demonstrated in recent works8,9. Two results from two different positions on the hBN sample used are displayed in Extended Data Fig. 11. The characteristic four-lobe polarization-dependent signal implies that the interaction region of the laser irradiation is small enough to be fit into the monocrystalline hBN patch. This way, the single crystalline orientation is dominant and does not get averaged out over multiple grains with different crystalline orientations. Further, one can observe that the four-lobe structure exhibits an angular offset with the four-lobe structure obtained from a neighboring hBN patch as shown in subplots (a) and (b) in Extended Data Fig. 11. This manifests from the hBN crystalline patches, themselves being oriented in arbitrary angles at different laser excitation sites. Usually, a six-lobe feature in the SHG signals can be used to indicate the orientation of hBN8. This difference is attributed to lab-to-incident polarization frame conversion. In the present case the SHG polarization microscopy was done in transmission mode keeping the sample fixed for a given hBN patch. The sensitivity of this technique to the presence of hBN on the fused silica substrate allows it to be used as a marker for laser-induced damage. This confirms the suitable intensity range reaching close to 1013 W/cm2 before damage occurs.

# References:

1 Jimenez-Galan, A., Silva, R. E. F., Smirnova, O. & Ivanov, M. Lightwave control of topological properties in 2D materials for sub-cycle and non-resonant valley manipulation. *Nat Photonics* **14**, 728-732 (2020).

2 Silva, R. E. F., Martin, F. & Ivanov, M. High harmonic generation in crystals using maximally localized Wannier functions. *Phys Rev B* **100**, 195201 (2019).

3 Joachain, C. J., Kylstra, N. J. & Potvliege, R. M. *Atoms in Intense Laser Fields*. (Cambridge University Press, 2012).

4 Neuhaus, M. *et al.* 10 W CEP-stable few-cycle source at 2 mu m with 100 kHz repetition rate. *Opt Express* **26**, 16074-16085 (2018).

5 Trebino, R. *et al.* Measuring ultrashort laser pulses in the time-frequency domain using frequency-resolved optical gating. *Rev Sci Instrum* **68**, 3277-3295 (1997).

6 Boyd, R. & Prato, D. *Nonlinear Optics*. (Elsevier Science, 2008).

7 Mitra, S. *et al.* Suppression of individual peaks in two-colour high harmonic generation. *Journal of Physics B-Atomic Molecular and Optical Physics* **53**, 134004 (2020).

8 Li, Y. L. *et al.* Probing Symmetry Properties of Few-Layer MoS2 and h-BN by Optical Second-Harmonic Generation. *Nano Letters* **13**, 3329-3333 (2013).

9 Rosa, H. G. *et al.* Characterization of the second- and third-harmonic optical susceptibilities of atomically thin tungsten diselenide. *Scientific Reports* **8** (2018).
